# Supplementary material for: Secular Trends in Time-of-Day of Energy Intake in a Chinese Cohort
Source: MDPI journal article supplement (doi:10.3390/nu14102019), 2022-05-11
Supplement: s1 [file s1]

**Table S1.** Marginal means of energy proportion of breakfast, lunch, dinner by gender, age-group and location

|                                                 | 1991 Year<br>(N = 6915) | 1993 Year<br>(N = 7066) | 1997 Year<br>(N = 7125) | 2000 Year<br>(N = 7379) | 2004 Year<br>(N = 8022) | 2006 Year<br>(N = 8069) | 2009 Year<br>(N = 8576) | 2011 Year<br>(N = 10,411) | 2015 Year<br>(N = 11,846) | 2018 Year<br>(N = 10,249) |
|-------------------------------------------------|-------------------------|-------------------------|-------------------------|-------------------------|-------------------------|-------------------------|-------------------------|---------------------------|---------------------------|---------------------------|
| Breakfast EI% (marginal mean [SE]) <sup>1</sup> |                         |                         |                         |                         |                         |                         |                         |                           |                           |                           |
| Male                                            | 26.8(0.16)              | 26.2(0.13)              | 25.4(0.10)              | 25.1(0.10)              | 25.2(0.10)              | 25.4(0.09)              | 25.9(0.09)              | 26.4(0.09)                | 27.8(0.11)                | 29.1(0.14)                |
| Female                                          | 26.9(0.16)              | 26.4(0.13)              | 25.8(0.10)              | 25.7(0.09)              | 25.9(0.09)              | 26.1(0.09)              | 26.7(0.09)              | 27.2(0.08)                | 28.6(0.10)                | 30.0(0.13)                |
| 18–59 years                                     | 26.6(0.12)              | 26.1(0.10)              | 25.5(0.08)              | 25.3(0.07)              | 25.5(0.07)              | 25.7(0.07)              | 26.3(0.07)              | 26.8(0.07)                | 28.2(0.09)                | 29.6(0.12)                |
| ≥60 years                                       | 26.9(0.28)              | 26.4(0.23)              | 25.8(0.16)              | 25.6(0.14)              | 25.8(0.13)              | 26.0(0.13)              | 26.6(0.12)              | 27.1(0.11)                | 28.5(0.11)                | 29.8(0.15)                |
| Urban                                           | 24.7(0.19)              | 24.4(0.15)              | 23.9(0.11)              | 23.8(0.10)              | 24.1(0.10)              | 24.3(0.10)              | 24.9(0.09)              | 25.4(0.09)                | 26.8(0.10)                | 28.0(0.14)                |
| Rural                                           | 28.0(0.14)              | 27.4(0.12)              | 26.5(0.09)              | 26.2(0.09)              | 26.3(0.09)              | 26.5(0.08)              | 27.0(0.08)              | 27.5(0.08)                | 29.0(0.10)                | 30.4(0.12)                |
| Lunch EI% (marginal mean [SE]) <sup>1</sup>     |                         |                         |                         |                         |                         |                         |                         |                           |                           |                           |
| Male                                            | 36.9(0.16)              | 37.0(0.13)              | 37.2(0.10)              | 37.1(0.10)              | 36.9(0.10)              | 36.7(0.09)              | 36.4(0.09)              | 36.0(0.09)                | 35.3(0.11)                | 34.6(0.14)                |
| Female                                          | 36.8(0.16)              | 36.9(0.13)              | 36.9(0.10)              | 36.8(0.09)              | 36.5(0.09)              | 36.3(0.09)              | 35.9(0.09)              | 35.6(0.09)                | 34.8(0.10)                | 34.1(0.13)                |
| 18–59 years                                     | 37.2(0.12)              | 37.3(0.10)              | 37.3(0.08)              | 37.2(0.07)              | 36.8(0.07)              | 36.6(0.07)              | 36.2(0.07)              | 35.8(0.07)                | 35.0(0.09)                | 34.3(0.12)                |
| ≥60 years                                       | 36.3(0.29)              | 36.4(0.24)              | 36.5(0.17)              | 36.4(0.14)              | 36.2(0.13)              | 36.1(0.13)              | 35.7(0.12)              | 35.4(0.11)                | 34.7(0.11)                | 34.1(0.15)                |
| Urban                                           | 38.2(0.18)              | 38.0(0.14)              | 37.7(0.10)              | 37.4(0.10)              | 36.9(0.10)              | 36.7(0.09)              | 36.2(0.09)              | 35.9(0.09)                | 35.2(0.10)                | 34.7(0.14)                |
| Rural                                           | 36.2(0.14)              | 36.5(0.12)              | 36.8(0.10)              | 36.8(0.09)              | 36.7(0.09)              | 36.5(0.09)              | 36.1(0.08)              | 35.8(0.08)                | 34.9(0.10)                | 34.0(0.13)                |
| Dinner EI% (marginal mean [SE]) <sup>1</sup>    |                         |                         |                         |                         |                         |                         |                         |                           |                           |                           |
| Male                                            | 37.4(0.14)              | 37.6(0.12)              | 37.7(0.09)              | 37.7(0.09)              | 37.5(0.08)              | 37.4(0.08)              | 37.1(0.08)              | 36.8(0.08)                | 36.2(0.09)                | 35.6(0.13)                |
| Female                                          | 37.0(0.14)              | 37.1(0.12)              | 37.1(0.09)              | 37.0(0.08)              | 36.8(0.08)              | 36.5(0.08)              | 36.1(0.08)              | 35.8(0.08)                | 35.0(0.09)                | 34.2(0.12)                |
| 18–59 years                                     | 37.4(0.11)              | 37.5(0.09)              | 37.6(0.07)              | 37.6(0.07)              | 37.3(0.07)              | 37.1(0.07)              | 36.8(0.06)              | 36.5(0.06)                | 35.7(0.08)                | 35.0(0.11)                |
| ≥60 years                                       | 37.2(0.25)              | 37.2(0.20)              | 37.2(0.14)              | 37.1(0.13)              | 36.8(0.12)              | 36.6(0.11)              | 36.2(0.10)              | 35.8(0.10)                | 35.1(0.10)                | 34.4(0.13)                |
| Urban                                           | 37.1(0.18)              | 37.4(0.14)              | 37.8(0.10)              | 37.9(0.09)              | 37.7(0.09)              | 37.5(0.09)              | 37.1(0.09)              | 36.6(0.08)                | 35.6(0.10)                | 34.5(0.13)                |
| Rural                                           | 37.1(0.12)              | 37.2(0.10)              | 37.2(0.08)              | 37.1(0.08)              | 36.9(0.07)              | 36.7(0.07)              | 36.4(0.07)              | 36.2(0.07)                | 35.6(0.08)                | 35.0(0.11)                |

<sup>1</sup> Multilevel linear mixed model was applied. Models were adjusted for age, gender, educational level, geographical region, total physical activity, smoking, alcohol drinking, annual per capita household income, community urbanicity index, chronic disease history, total energy intake, and BMI.

**Table S2.** Marginal means of energy proportion of morning snack, afternoon snack, evening snack by gender, age-group and location

|                                                       | 1991 Year<br>(N = 6915) | 1993 Year<br>(N = 7066) | 1997 Year<br>(N = 7125) | 2000 Year<br>(N = 7379) | 2004 Year<br>(N = 8022) | 2006 Year<br>(N = 8069) | 2009 Year<br>(N = 8576) | 2011 Year<br>(N = 10,411) | 2015 Year<br>(N = 11,846) | 2018 Year<br>(N = 10,249) |
|-------------------------------------------------------|-------------------------|-------------------------|-------------------------|-------------------------|-------------------------|-------------------------|-------------------------|---------------------------|---------------------------|---------------------------|
| Morning snack EI% (marginal mean [SE]) <sup>1</sup>   |                         |                         |                         |                         |                         |                         |                         |                           |                           |                           |
| Male                                                  | 0.01(0.002)             | 0.02(0.002)             | 0.03(0.002)             | 0.04(0.002)             | 0.07(0.003)             | 0.09(0.004)             | 0.12(0.005)             | 0.15(0.005)               | 0.22(0.007)               | 0.30(0.011)               |
| Female                                                | 0.01(0.001)             | 0.01(0.002)             | 0.03(0.002)             | 0.04(0.002)             | 0.08(0.003)             | 0.11(0.004)             | 0.16(0.005)             | 0.20(0.006)               | 0.32(0.008)               | 0.44(0.012)               |
| 18–59 years                                           | 0.01(0.001)             | 0.01(0.001)             | 0.03(0.002)             | 0.04(0.002)             | 0.07(0.003)             | 0.09(0.003)             | 0.14(0.004)             | 0.18(0.005)               | 0.29(0.007)               | 0.40(0.012)               |
| ≥60 years                                             | 0.01(0.004)             | 0.02(0.004)             | 0.03(0.004)             | 0.05(0.004)             | 0.08(0.004)             | 0.10(0.005)             | 0.14(0.006)             | 0.18(0.007)               | 0.26(0.008)               | 0.35(0.012)               |
| Urban                                                 | 0.01(0.002)             | 0.02(0.003)             | 0.04(0.003)             | 0.06(0.003)             | 0.10(0.004)             | 0.13(0.005)             | 0.19(0.006)             | 0.24(0.007)               | 0.35(0.009)               | 0.46(0.014)               |
| Rural                                                 | 0.01(0.001)             | 0.01(0.001)             | 0.02(0.002)             | 0.04(0.002)             | 0.06(0.002)             | 0.08(0.003)             | 0.12(0.004)             | 0.15(0.005)               | 0.24(0.007)               | 0.34(0.011)               |
| Afternoon snack EI% (marginal mean [SE]) <sup>1</sup> |                         |                         |                         |                         |                         |                         |                         |                           |                           |                           |
| Male                                                  | 0.02(0.002)             | 0.03(0.003)             | 0.05(0.003)             | 0.08(0.003)             | 0.13(0.004)             | 0.16(0.005)             | 0.21(0.006)             | 0.24(0.006)               | 0.30(0.008)               | 0.35(0.011)               |
| Female                                                | 0.02(0.002)             | 0.03(0.003)             | 0.06(0.003)             | 0.10(0.003)             | 0.16(0.004)             | 0.20(0.005)             | 0.27(0.006)             | 0.32(0.007)               | 0.42(0.008)               | 0.50(0.012)               |
| 18–59 years                                           | 0.02(0.002)             | 0.03(0.002)             | 0.05(0.002)             | 0.08(0.003)             | 0.14(0.003)             | 0.17(0.004)             | 0.23(0.005)             | 0.28(0.006)               | 0.38(0.008)               | 0.47(0.011)               |
| ≥60 years                                             | 0.01(0.003)             | 0.02(0.004)             | 0.05(0.006)             | 0.09(0.006)             | 0.17(0.006)             | 0.21(0.007)             | 0.26(0.008)             | 0.30(0.009)               | 0.35(0.009)               | 0.37(0.012)               |
| Urban                                                 | 0.04(0.005)             | 0.05(0.005)             | 0.09(0.005)             | 0.13(0.005)             | 0.20(0.006)             | 0.24(0.007)             | 0.31(0.008)             | 0.36(0.008)               | 0.47(0.010)               | 0.56(0.015)               |
| Rural                                                 | 0.01(0.002)             | 0.02(0.002)             | 0.04(0.002)             | 0.07(0.003)             | 0.12(0.003)             | 0.16(0.004)             | 0.21(0.005)             | 0.25(0.006)               | 0.32(0.007)               | 0.37(0.010)               |
| Evening snack EI% (marginal mean [SE]) <sup>1</sup>   |                         |                         |                         |                         |                         |                         |                         |                           |                           |                           |
| Male                                                  | 0.03(0.003)             | 0.04(0.003)             | 0.07(0.003)             | 0.11(0.003)             | 0.16(0.004)             | 0.18(0.005)             | 0.23(0.006)             | 0.26(0.006)               | 0.33(0.008)               | 0.38(0.011)               |
| Female                                                | 0.04(0.003)             | 0.05(0.003)             | 0.08(0.003)             | 0.12(0.004)             | 0.18(0.004)             | 0.21(0.005)             | 0.26(0.006)             | 0.30(0.006)               | 0.39(0.008)               | 0.45(0.011)               |
| 18–59 years                                           | 0.04(0.003)             | 0.05(0.003)             | 0.08(0.003)             | 0.11(0.003)             | 0.17(0.004)             | 0.20(0.004)             | 0.25(0.005)             | 0.29(0.006)               | 0.38(0.007)               | 0.46(0.011)               |
| ≥60 years                                             | 0.02(0.004)             | 0.03(0.005)             | 0.07(0.006)             | 0.10(0.006)             | 0.16(0.006)             | 0.19(0.007)             | 0.24(0.008)             | 0.27(0.008)               | 0.32(0.009)               | 0.34(0.012)               |
| Urban                                                 | 0.10(0.008)             | 0.12(0.007)             | 0.18(0.006)             | 0.23(0.006)             | 0.31(0.007)             | 0.34(0.008)             | 0.40(0.008)             | 0.43(0.009)               | 0.50(0.010)               | 0.54(0.013)               |
| Rural                                                 | 0.02(0.002)             | 0.02(0.002)             | 0.04(0.002)             | 0.07(0.002)             | 0.11(0.003)             | 0.14(0.004)             | 0.19(0.005)             | 0.23(0.005)               | 0.32(0.007)               | 0.38(0.011)               |

<sup>1</sup>Log-transformation was done to improve normality before multilevel Tobit regression model was applied. Models were adjusted for age, gender, educational level, geographical region, total physical activity, smoking, alcohol drinking, annual per capita household income, community urbanicity index, chronic disease history, total energy intake, and BMI.
